# Supplementary material
Source: PubMed Central journal article supplement (PMC6235113)
Supplement: NIHMS77722-supplement-Supplementary_Table_1.pdf [file NIHMS77722-supplement-Supplementary_Table_1.pdf]

| Target region                            | Coordinates (mm) |                |         | Cannula (mm) |          |                   |
|------------------------------------------|------------------|----------------|---------|--------------|----------|-------------------|
|                                          | ML               | AP             | DV      | Dual         | Internal | Volume ( $\mu$ L) |
| Amygdala                                 | $\pm 2.80$       | $-1.60b$       | $-4.75$ | —            | $-0.75$  | 1.2-1.5           |
| Periaqueductal gray, dorsal <sup>1</sup> | $\pm 0.60$       | $-0.45\lambda$ | $-2.20$ | 1.2          | $-0.50$  | 0.6-0.8           |
| Superior colliculus, medial              | $\pm 0.50-0.60$  | $-0.20\lambda$ | $-1.50$ | 1.0-1.2      | $-0.50$  | 1.0               |
| V1                                       | $\pm 2.50$       | $+0.50\lambda$ | $-0.30$ | —            | $-0.75$  | 1.0               |
| Parabigeminal nucleus <sup>2</sup>       | $\pm 2.40$       | $-0.35\lambda$ | $-2.75$ | —            | $-0.75$  | 0.8               |

<sup>1</sup> For combined optogenetic experiments in Extended Data Fig. 6, mSC VGluT2::Chr2 and optic fiber implant performed in same surgery

<sup>2</sup> Performed in mSC VGluT2::Chr2 animals with optic fiber implanted in same surgery. Infusion cannulae angled 15° lateral from zenith.

**Supplementary Table 1 | Experimental parameters for pharmacological inactivation of circuit elements.**

Cannula implant coordinates are specified from bregma (b) or lambda ( $\lambda$ ). The final target depth is the sum of the DV and internal lengths. When dual implants were used, the width between the cannulae is given.
